# Supplementary material for: GeneGini: Assessment via the Gini Coefficient of Reference “Housekeeping” Genes and Diverse Human Transporter Expression Profiles
Source: PubMed Central journal article supplement (PMC5840522; doi:10.1016/j.cels.2018.01.003), 2018-02-28
Supplement: mmc1.pdf [file mmc1.pdf]

**Cell Systems, Volume 6**

**Supplemental Information**

**GeneGini: Assessment via the Gini Coefficient  
of Reference “Housekeeping” Genes  
and Diverse Human Transporter Expression Profiles**

**Steve O'Hagan, Marina Wright Muelas, Philip J. Day, Emma Lundberg, and Douglas B. Kell**

## SUPPLEMENTARY INFORMATION

The extra subsetted data that we give in the Supplementary Information are as follows:

**Supplementary Table S1.** Related to Fig 1. Expression profiles of the SLC transporters. Separate XL File: Supplementary Table S1 SLC\_transporters\_RNA\_data\_HPA.xlsx

**Supplementary Table S2.** Related to Fig 4. Expression profiles of the ABC transporters. Separate XL File: Supplementary Table S2 ABC\_transporters\_RNA\_data\_HPA.xlsx

**Supplementary Table S3.** Related to STAR Methods. A previously proposed set of useful reference genes, annotated here with their correct names and Uniprot IDs, together with their median expression levels and Gini indices in tissues as determined in this work.

**Supplementary Table S4.** Related to STAR Methods. Some genes that have previously been proposed as housekeeping or reference genes.

### Supplementary Figures.

**S1** (Relates to Fig 1.) Expression profiling of various SLC transporters in 59 tissues. Minimum and maximum expression levels of various SLCs in the 59 tissues considered (those with undetectable expression (i.e. <0.01 TPM, coded as zero) are not shown).

**S2.** (Relates to Fig 1.) Expression profiling of various SLC transporters in 59 tissues. The expression level of SLC35A4 is relatively homogeneous, with  $\frac{3}{4}$  of all tissues within a factor two.

**S3.** (Relates to Fig 1.) Expression profiling of various SLC transporters in 59 tissues. The expression levels of SLC35F2 vary much more considerably, by a range of ~200 in these 59 tissue types.

**S4.** (Relates to Fig 1.) Expression profiling of various SLC transporters in 59 tissues. Expression profile of the transcripts for SLC22A4.

**S5.** (Relates to Fig 2.) Zoomed-in version of cluster 1 of Figure 2.

**S6.** (Relates to Fig 2.) Zoomed-in version of cluster 2 of Figure 2.

**S7.** (Relates to Fig 2.) Zoomed-in version of cluster 3 of Figure 2.

**S8.** (Relates to Fig 2.) Zoomed-in version of cluster 4 of Figure 2.

| <b>Gene name</b> | <b>Protein name</b>                                                               | <b>Uniprot ID</b> | <b>Gini index in tissues</b> | <b>Median expression level (TPM)</b> |
|------------------|-----------------------------------------------------------------------------------|-------------------|------------------------------|--------------------------------------|
| <i>C1orf43</i>   | Chromosome 1 open reading frame 43                                                | Q9BWL3            | 0.204                        | 137                                  |
| <i>CHMP2A</i>    | Charged multivesicular body protein 2A                                            | O43633            | 0.141                        | 126                                  |
| <i>EMC7</i>      | ER membrane protein complex subunit 7                                             | Q9NPA0            | 0.210                        | 69                                   |
| <i>GPI</i>       | Glucose-6-phosphate isomerase                                                     | P06744            | 0.259                        | 137                                  |
| <i>PSMB2</i>     | Proteome subunit beta type 2                                                      | P49721            | 0.186                        | 32                                   |
| <i>PSMB4</i>     | Proteome subunit beta type 4                                                      | P28070            | 0.200                        | 209                                  |
| <i>RAB7A</i>     | RAS-related protein 7A                                                            | P51149            | 0.171                        | 167                                  |
| <i>REEP5</i>     | Receptor expression-enhancing protein 5                                           | Q00765            | 0.315                        | 65                                   |
| <i>SNRPD3</i>    | Small nuclear ribonucleoprotein Sm D3                                             | P62318            | 0.192                        | 55                                   |
| <i>VCP</i>       | Transitional endoplasmic reticulum ATPase (originally valosin containing protein) | P55072            | 0.198                        | 48                                   |
| <i>VPS29</i>     | Vacuolar protein sorting associated protein 29                                    | Q9UBQ0            | 0.146                        | 74                                   |

**Supplementary Table S3.** A previously proposed set of useful reference genes, annotated here with their correct names and Uniprot IDs, together with their median expression levels and Gini indices in tissues as determined in this work.

| <b>Gene</b>   | <b>Protein</b>                                             | <b>Uniprot ID</b> | <b>Gini index</b> |
|---------------|------------------------------------------------------------|-------------------|-------------------|
| <i>GAPDH</i>  | Glyceraldehyde 3-phosphate dehydrogenase                   | P04406            | 0.344             |
| <i>LDHA</i>   | Lactate dehydrogenase subunit A                            | P00338            | 0.32              |
| <i>SDHA</i>   | Succinate dehydrogenase subunit A                          | P31040            | 0.308             |
| <i>HRPT1</i>  | Hypoxanthine phosphoribosyl transferase 1                  | P00492            | 0.277             |
| <i>HBS1L</i>  | <i>HBS1</i> -like protein                                  | Q9Y450            | 0.184             |
| <i>OAZ1</i>   | Ornithine decarboxylase antizyme 1                         | P54368            | 0.202             |
| <i>PPIA1</i>  | Peptidyl-prolyl cis-trans isomerase                        | P62937            | 0.24              |
| <i>AHSP</i>   | Alpha-haemoglobin stabilising protein                      | Q9NZD4            | 0.97              |
| <i>B2M</i>    | $\beta_2$ -microglobulin                                   | P61769            | 0.349             |
| <i>ACTB</i>   | $\beta$ -actin                                             | P60709            | 0.291             |
| <i>HMBS</i>   | Porphobilinogen deaminase                                  | P08397            | 0.303             |
| <i>UBC</i>    | Polyubiquitin C                                            | P0CG48            | 0.183             |
| <i>POLR2F</i> | DNA-directed RNA polymerases I, II, and III subunit RPABC2 | P61218            | 0.235             |
| <i>GUSB</i>   | $\beta$ -glucuronidase                                     | P08236            | 0.25              |
| <i>TBP</i>    | TATA-box binding protein                                   | P20226            | 0.22              |
| <i>YWHAZ</i>  | 14-3-3 protein zeta/delta                                  | P63104            | 0.255             |

**Supplementary Table S4.** Some genes that have previously been proposed as housekeeping or reference genes.

# S1

Minimum expression level

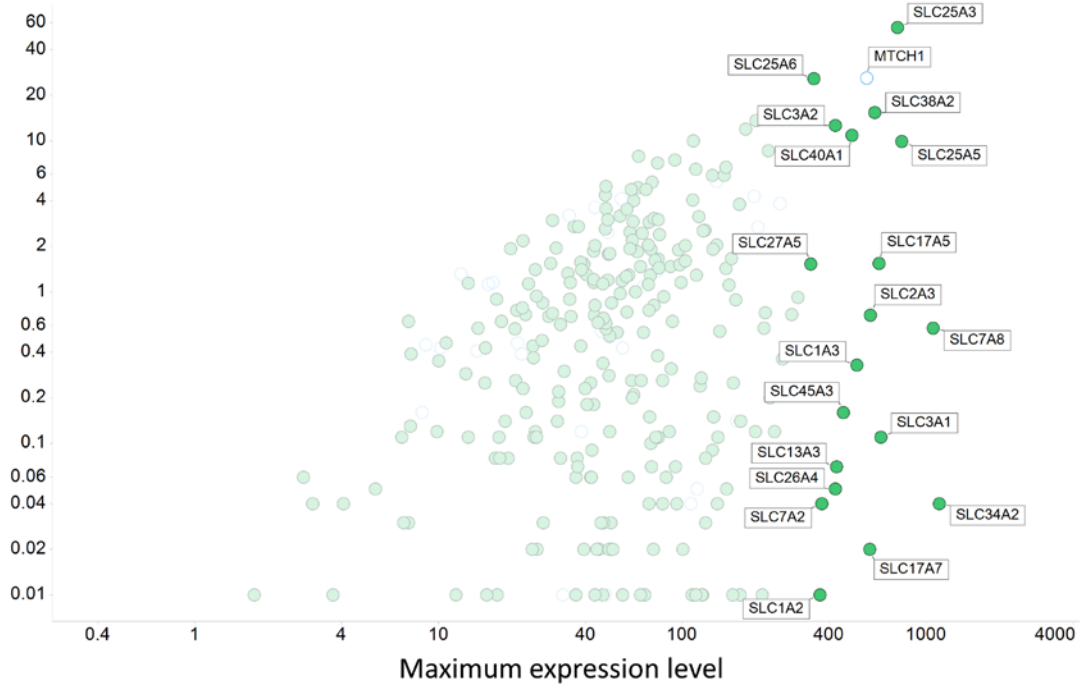

**Supplementary Fig S1** (Relates to Fig 1.) Expression profiling of various SLC transporters in 59 tissues. Minimum and maximum expression levels of various SLCs in the 59 tissues considered (those with undetectable expression (i.e. <0.01 TPM, coded as zero) are not shown).

## S2

### SLC35A4 expression

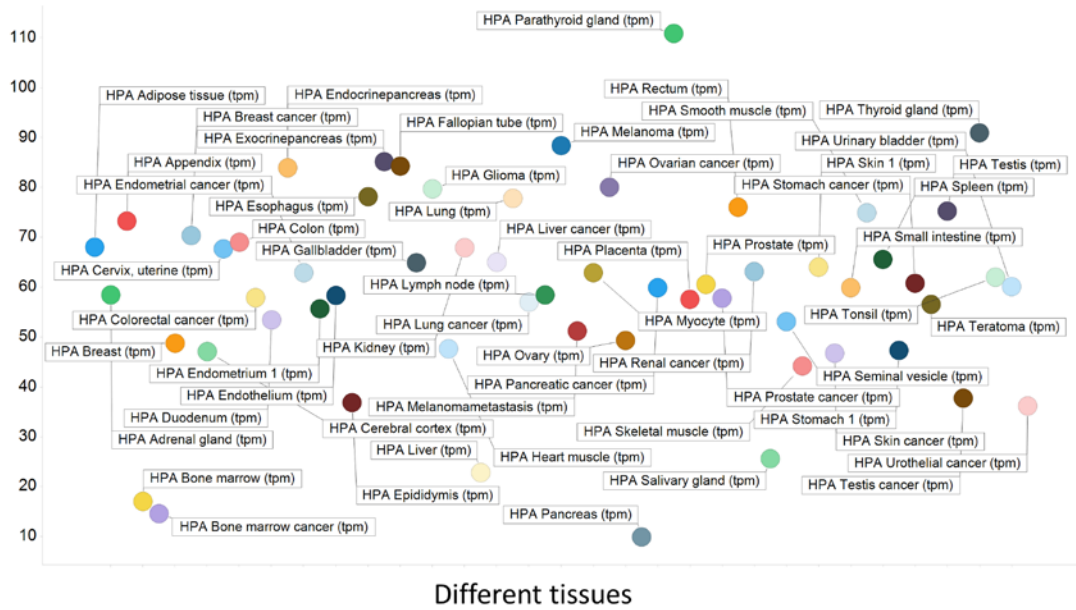

**Supplementary Fig S2.** (Relates to Fig 1.) Expression profiling of various SLC transporters in 59 tissues. The expression level of SLC35A4 is relatively homogeneous, with  $\frac{3}{4}$  of all tissues within a factor two.

### S3

#### SLC35F2 expression

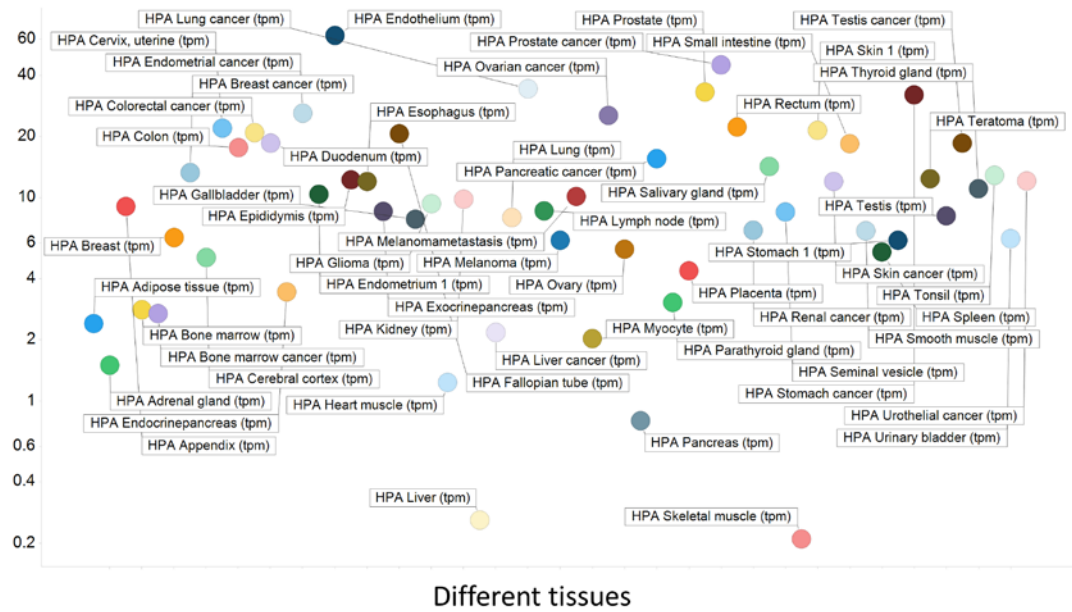

**Supplementary Fig S3.** (Relates to Fig 1.) Expression profiling of various SLC transporters in 59 tissues. The expression levels of SLC35F2 vary much more considerably, by a range of ~200 in these 59 tissue types.





### Cluster 1

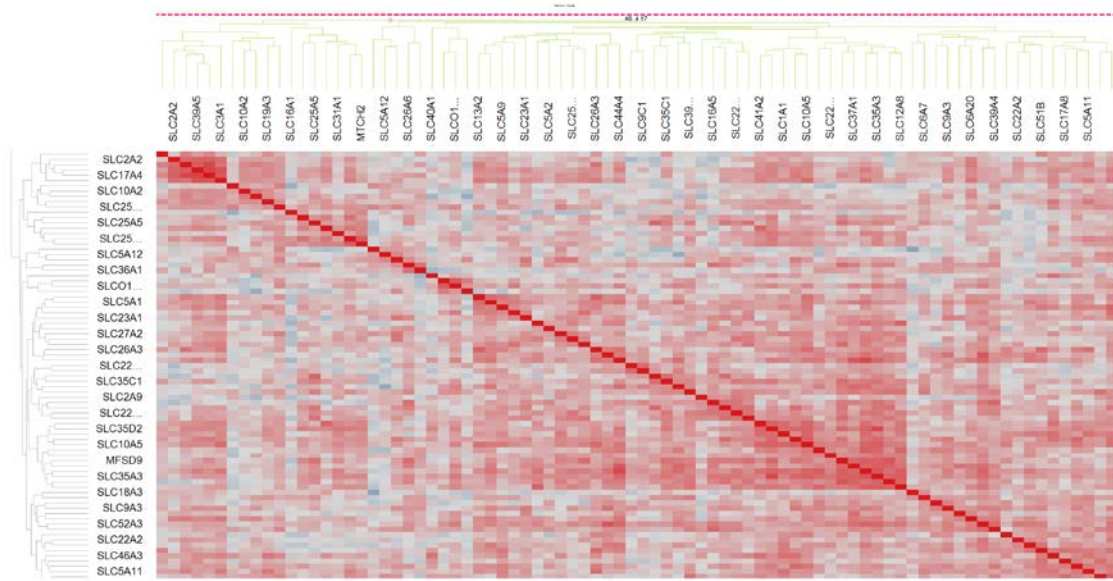

**Supplementary Fig S5.** (Relates to Fig 2.) Zoomed-in version of cluster 1 of Figure 2.

S6

## Cluster 2

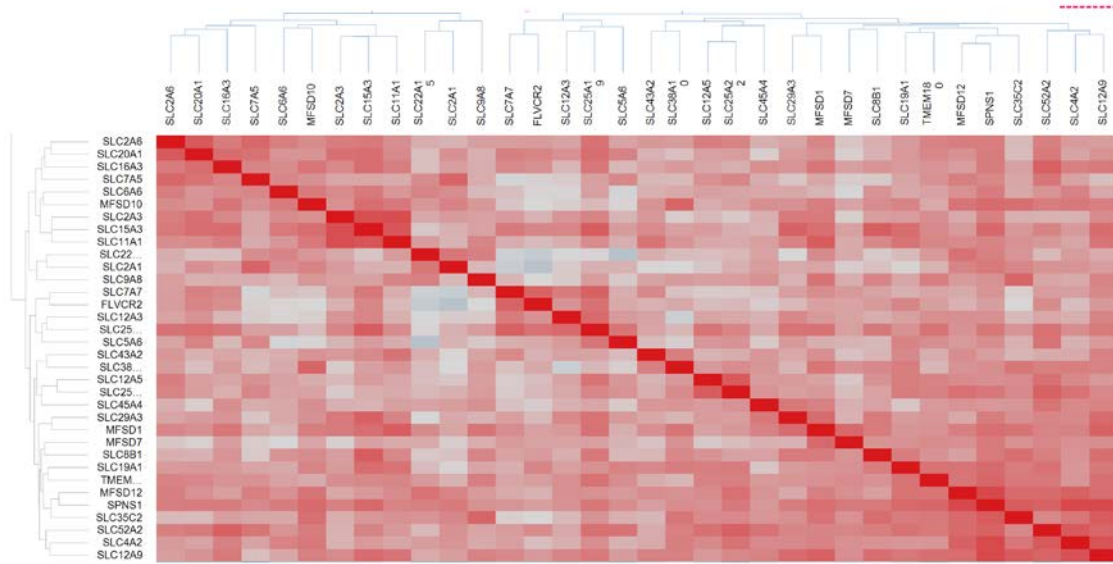

Supplementary Fig S6. (Relates to Fig 2.) Zoomed-in versions cluster2 of Figure 2.

S7

### Cluster 3

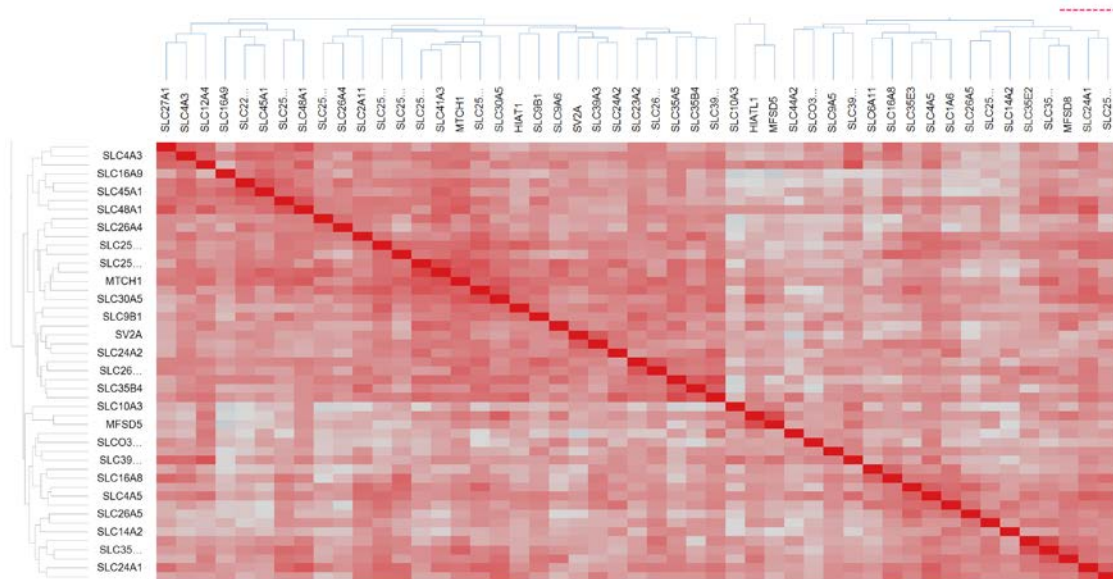

Supplementary Fig S7. (Relates to Fig 2.) Zoomed-in version cluster 3 of Figure 2.

S8

### Cluster 4

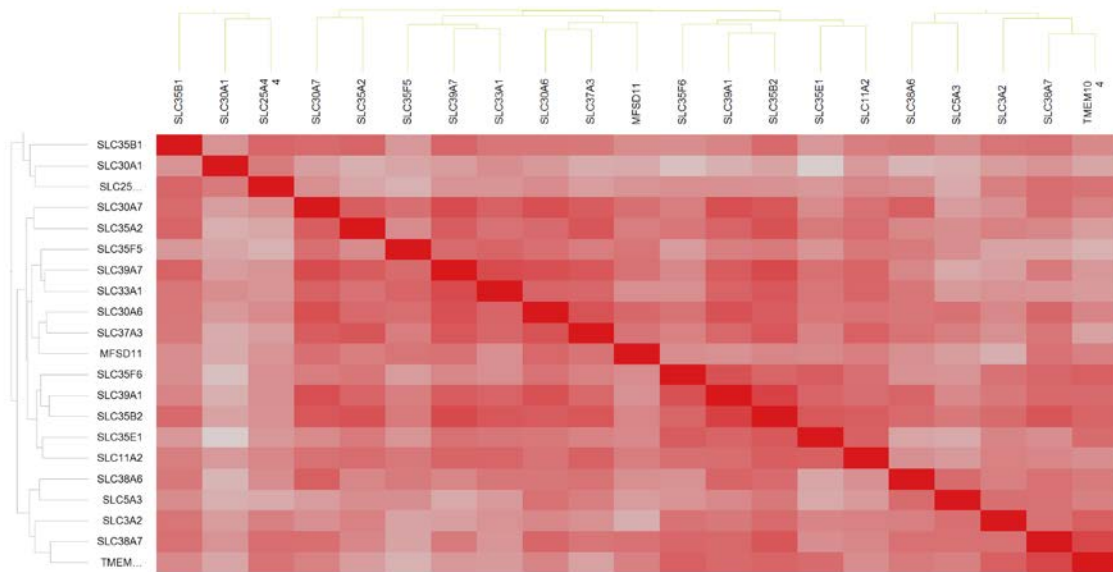

**Supplementary Fig S8.** (Relates to Fig 2.) Zoomed-in version of cluster 4 of Figure 2.
